# Supplementary material for: Factors that influence the pancreatic and duodenal microbiome in patients undergoing pancreatic surgery
Source: PubMed Central journal article supplement (PMC9757549; doi:10.1371/journal.pone.0278377), 2022-12-16

Relative abundance of paired samples

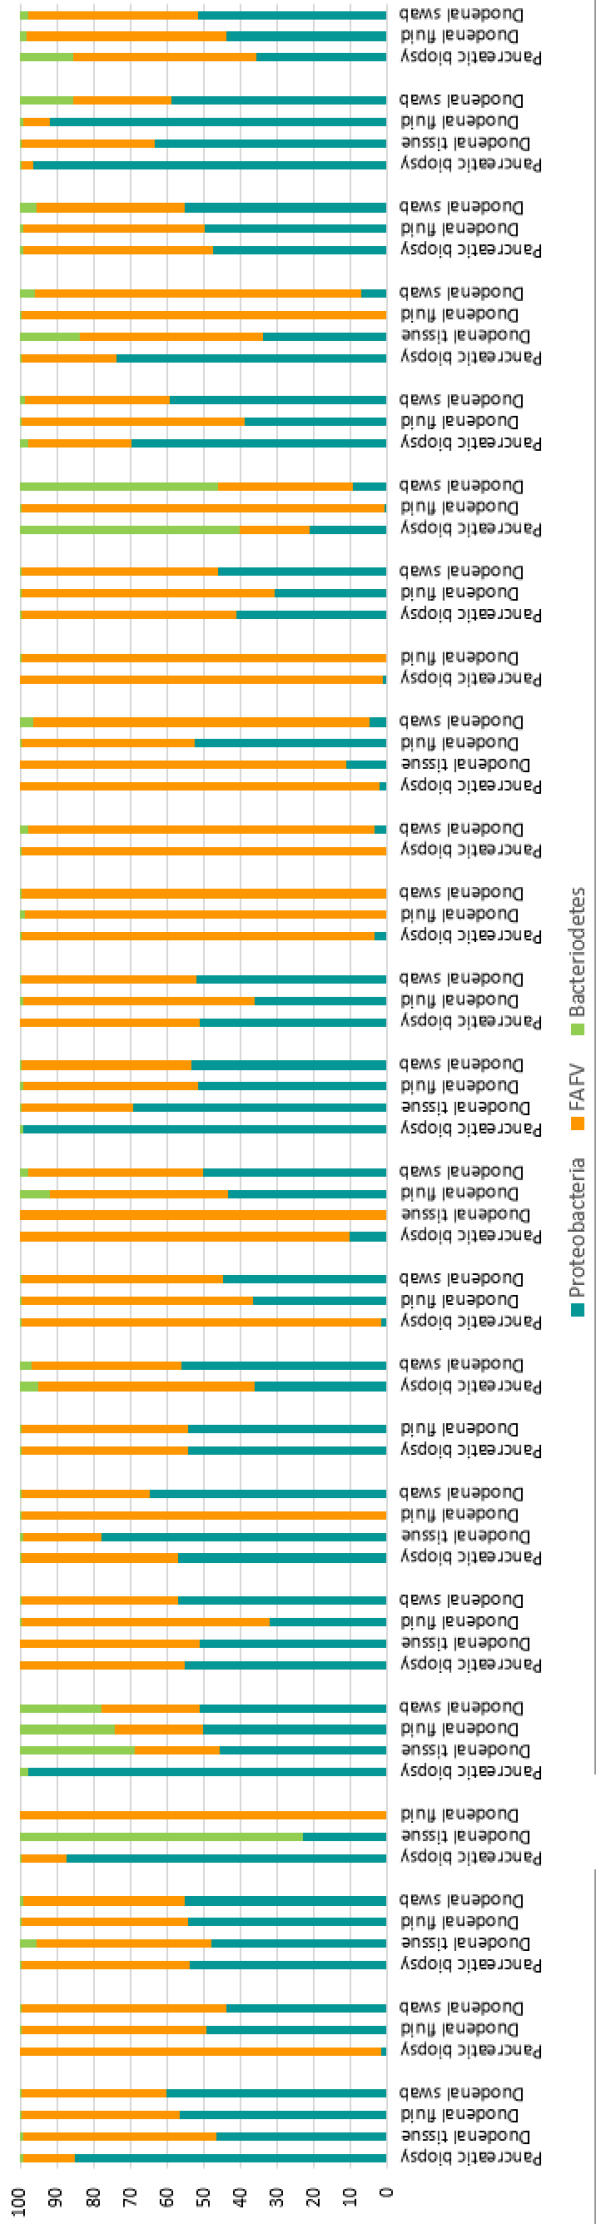

Supplement: pone.0278377.s001.pdf [file pone.0278377.s001.pdf]
